# Supplementary material for: Genome-Wide Analysis of UGT Genes in Petunia and Identification of PhUGT51 Involved in the Regulation of Salt Resistance
Source: MDPI journal article supplement (doi:10.3390/plants11182434), 2022-09-19
Supplement: s1 [file s1]

Table S2: Primer Sequences in This Study

| Primer Name | Primer Sequence         |
|-------------|-------------------------|
| UGT51-qRT-F | TCCATGCATGCACCAACCAACAG |
| UGT51-qRT-R | TCATAGTAGACAGCAGTAACAGA |
| UGT51-F     | ATGGGAACAGTACAAGAACTATT |
| UGT51-R     | TCACATTGCTGGCTTCTACTTCA |
| PhGAPDH-F   | CAAGGCTGGAATTGCTTTGAG   |
| PhGAPDH-R   | CACCACTTTACTCCACTGATGCA |
