# Supplementary material for: Genome-Wide Analysis of UGT Genes in Petunia and Identification of PhUGT51 Involved in the Regulation of Salt Resistance
Source: MDPI journal article supplement (doi:10.3390/plants11182434), 2022-09-19
Supplement: s1 [file s1]

Table S1. Protein Information of PhUGT.

| Accession number         | Gene name | Number of  |                  | Theoretical | Instability | Aliphatic | Subcellular   |
|--------------------------|-----------|------------|------------------|-------------|-------------|-----------|---------------|
|                          |           | amino acid | Molecular weight | pI          | index       | index     |               |
|                          |           | (aa)       | (kDa)            |             |             |           | localization  |
| Peinf101Scf00445g13007.1 | PhUGT1    | 452        | 51.41            | 5.35        | 38.49       | 94.2      | Microsome     |
| Peinf101Scf00364g04006.1 | PhUGT2    | 502        | 55.50            | 5.75        | 48.78       | 92.03     | Microsome     |
| Peinf101Scf01858g01005.1 | PhUGT3    | 492        | 54.66            | 5.55        | 42.8        | 96.24     | Cytoplasm     |
| Peinf101Scf01217g00013.1 | PhUGT4    | 517        | 58.30            | 5.53        | 44.32       | 86.73     | Cell membrane |
| Peinf101Scf00546g06024.1 | PhUGT5    | 515        | 57.73            | 6.81        | 38.35       | 92.12     | Cell membrane |
| Peinf101Scf00221g16009.1 | PhUGT6    | 487        | 54.28            | 5.68        | 44.94       | 95.07     | Microsome     |
| Peinf101Scf00920g01024.1 | PhUGT7    | 349        | 38.98            | 4.69        | 43.26       | 99.94     | Microsome     |
| Peinf101Scf00920g00001.1 | PhUGT8    | 483        | 54.09            | 5.36        | 42.59       | 85.36     | Microsome     |
| Peinf101Scf00714g05008.1 | PhUGT9    | 497        | 56.22            | 6.15        | 53.1        | 91.83     | Microsome     |
| Peinf101Scf00920g00003.1 | PhUGT10   | 488        | 54.14            | 5.07        | 51.61       | 95.08     | Microsome     |
| Peinf101Scf00244g11013.1 | PhUGT11   | 475        | 54.11            | 5.48        | 48.63       | 86.36     | Microsome     |
| Peinf101Scf00930g02010.1 | PhUGT12   | 478        | 53.45            | 5.85        | 46.36       | 98.7      | Microsome     |
| Peinf101Scf00471g09012.1 | PhUGT13   | 481        | 53.54            | 5.99        | 41.45       | 89.11     | Microsome     |
| Peinf101Scf00184g02016.1 | PhUGT14   | 473        | 54.34            | 5.55        | 46.17       | 89.05     | Microsome     |
| Peinf101Scf00421g00001.1 | PhUGT15   | 475        | 53.57            | 9.37        | 47.47       | 86.36     | Microsome     |
| Peinf101Scf00122g02020.1 | PhUGT16   | 478        | 53.10            | 5.75        | 39.58       | 93.39     | Microsome     |
| Peinf101Scf00409g06004.1 | PhUGT17   | 473        | 53.15            | 5.81        | 56.32       | 87.61     | Microsome     |
| Peinf101Scf00248g04008.1 | PhUGT18   | 463        | 52.07            | 5.64        | 42.95       | 88.36     | Microsome     |
| Peinf101Scf00821g02023.1 | PhUGT19   | 448        | 50.52            | 5.18        | 43.53       | 89.62     | Microsome     |
| Peinf101Scf01538g02020.1 | PhUGT20   | 493        | 54.72            | 4.83        | 43.26       | 96.29     | Microsome     |
| Peinf101Scf00872g05003.1 | PhUGT21   | 470        | 52.70            | 6.08        | 48.95       | 88.26     | Microsome     |
| Peinf101Scf01074g00004.1 | PhUGT22   | 468        | 53.16            | 5.66        | 42.25       | 89.72     | Cell membrane |
| Peinf101Scf00170g04016.1 | PhUGT23   | 335        | 37.39            | 5.71        | 33.73       | 92.51     | Cytoplasm     |
| Peinf101Scf01602g01003.1 | PhUGT24   | 467        | 51.44            | 5.88        | 42.62       | 100.62    | Microsome     |
| Peinf101Scf01205g03036.1 | PhUGT25   | 460        | 51.83            | 5.13        | 43.01       | 92.8      | Microsome     |
| Peinf101Scf01117g05001.1 | PhUGT26   | 467        | 52.76            | 5.84        | 49.02       | 86.34     | Microsome     |
| Peinf101Scf00777g02005.1 | PhUGT27   | 467        | 52.77            | 5.99        | 63.82       | 76.62     | Microsome     |
| Peinf101Scf00645g07001.1 | PhUGT28   | 473        | 53.17            | 6.52        | 51.43       | 92.71     | Microsome     |
| Peinf101Scf04354g00002.1 | PhUGT29   | 494        | 55.84            | 5.32        | 34.01       | 93.6      | Microsome     |
| Peinf101Scf02029g00029.1 | PhUGT30   | 309        | 35.40            | 6.51        | 50.26       | 97.48     | Microsome     |

|                          |         |     |       |      |       |        |                          |
|--------------------------|---------|-----|-------|------|-------|--------|--------------------------|
| Peinf101Scf01117g09015.1 | PhUGT31 | 360 | 41.15 | 9.21 | 51.2  | 89.39  | Cytoplasm                |
| Peinf101Scf06781g00003.1 | PhUGT32 | 360 | 40.66 | 8.27 | 44.67 | 88.97  | Microsome                |
| Peinf101Scf00796g00026.1 | PhUGT33 | 478 | 54.40 | 6.24 | 38.13 | 96.03  | Microsome                |
| Peinf101Scf00487g12016.1 | PhUGT34 | 476 | 52.59 | 5.95 | 37.96 | 102.73 | Microsome                |
| Peinf101Scf00457g08001.1 | PhUGT35 | 500 | 56.01 | 5.7  | 36.69 | 97.3   | Microsome                |
| Peinf101Scf01178g03005.1 | PhUGT36 | 504 | 56.92 | 5.89 | 53.38 | 96.17  | Microsome                |
| Peinf101Scf02861g00015.1 | PhUGT37 | 488 | 55.21 | 5.81 | 47.64 | 93.85  | Microsome                |
| Peinf101Scf00267g11001.1 | PhUGT38 | 482 | 54.46 | 6.68 | 44.07 | 94.54  | Microsome                |
| Peinf101Scf00625g16001.1 | PhUGT39 | 482 | 54.45 | 6.55 | 42.53 | 97.01  | Microsome                |
| Peinf101Scf00920g01020.1 | PhUGT40 | 448 | 50.45 | 5.19 | 43.34 | 93.42  | Cytoplasm                |
| Peinf101Scf02472g00001.1 | PhUGT41 | 502 | 56.74 | 5.97 | 38.12 | 89.1   | Microsome                |
| Peinf101Scf00920g00002.1 | PhUGT42 | 422 | 46.80 | 5.27 | 45.43 | 89.41  | Microsome                |
| Peinf101Scf00373g36008.1 | PhUGT43 | 387 | 44.06 | 6.33 | 41.34 | 93.41  | Microsome                |
| Peinf101Scf01107g00001.1 | PhUGT44 | 504 | 57.01 | 5.37 | 40.87 | 89.27  | Microsome                |
| Peinf101Scf00837g10001.1 | PhUGT45 | 488 | 55.04 | 5.85 | 42.19 | 92.46  | Microsome                |
| Peinf101Scf00445g11017.1 | PhUGT46 | 484 | 56.06 | 6.96 | 40.99 | 94.83  | Microsome                |
| Peinf101Scf02339g08002.1 | PhUGT47 | 437 | 49.49 | 6.11 | 49.51 | 91.44  | Microsome                |
| Peinf101Scf00889g05004.1 | PhUGT48 | 368 | 42.07 | 6.36 | 46.91 | 88.64  | Microsome                |
| Peinf101Scf01436g03019.1 | PhUGT49 | 457 | 50.98 | 5.73 | 47.96 | 88.14  | Microsome                |
| Peinf101Scf00086g03003.1 | PhUGT50 | 448 | 49.57 | 6.06 | 38.58 | 93.35  | Microsome                |
| Peinf101Scf01317g03035.1 | PhUGT51 | 466 | 52.89 | 5.55 | 46.39 | 88.84  | Endoplasmic<br>reticulum |
| Peinf101Scf01353g00005.1 | PhUGT52 | 444 | 49.94 | 5.3  | 43.6  | 96.8   | Microsome                |
| Peinf101Scf01117g08002.1 | PhUGT53 | 447 | 50.91 | 5.95 | 52.59 | 87.63  | Microsome                |
| Peinf101Scf00034g05010.1 | PhUGT54 | 337 | 38.32 | 8.71 | 34.78 | 103.47 | Microsome                |
| Peinf101Scf00250g02011.1 | PhUGT55 | 462 | 51.62 | 4.97 | 45.84 | 86.28  | Cytoplasm                |
| Peinf101Scf01380g08048.1 | PhUGT56 | 467 | 52.81 | 5.3  | 37.44 | 86     | Microsome                |
| Peinf101Scf00019g00004.1 | PhUGT57 | 488 | 54.34 | 5.18 | 42.25 | 90.45  | Microsome                |
| Peinf101Scf00318g14021.1 | PhUGT58 | 433 | 48.18 | 5.18 | 42.17 | 97.74  | Microsome                |
| Peinf101Scf02621g01010.1 | PhUGT59 | 454 | 51.49 | 5.91 | 50.92 | 91.23  | Microsome                |
| Peinf101Scf15053g00004.1 | PhUGT60 | 548 | 61.54 | 6.52 | 46.52 | 76.99  | Microsome                |
| Peinf101Scf00536g01021.1 | PhUGT61 | 332 | 36.62 | 5.42 | 39.95 | 84.52  | Cytoplasm                |
| Peinf101Scf01295g00014.1 | PhUGT62 | 413 | 46.80 | 5.63 | 46.4  | 83.34  | Microsome                |

|                          |         |     |       |      |       |       |           |
|--------------------------|---------|-----|-------|------|-------|-------|-----------|
| Peinf101Scf00777g01016.1 | PhUGT63 | 451 | 49.02 | 5.4  | 39.13 | 90.8  | Microsome |
| Peinf101Scf01353g00003.1 | PhUGT64 | 460 | 52.48 | 5.8  | 38.28 | 96.61 | Microsome |
| Peinf101Scf01889g07014.1 | PhUGT65 | 441 | 49.25 | 5.2  | 47.65 | 86.85 | Microsome |
| Peinf101Scf01393g01001.1 | PhUGT66 | 451 | 51.35 | 5.87 | 39.81 | 94.24 | Microsome |
| Peinf101Scf00542g01001.1 | PhUGT67 | 463 | 51.55 | 6.62 | 44.31 | 97.3  | Microsome |
| Peinf101Scf00838g05001.1 | PhUGT68 | 456 | 51.81 | 5.35 | 46.99 | 96.64 | Microsome |
| Peinf101Scf08918g00005.1 | PhUGT69 | 441 | 49.57 | 5.77 | 47.71 | 86.64 | Microsome |
| Peinf101Scf00445g13011.1 | PhUGT70 | 434 | 49.33 | 6.19 | 51.73 | 91.13 | Microsome |
| Peinf101Scf00871g04013.1 | PhUGT71 | 474 | 53.59 | 5.41 | 34.46 | 89.22 | Microsome |
| Peinf101Scf01294g07004.1 | PhUGT72 | 451 | 50.99 | 5.77 | 40.08 | 92.71 | Microsome |
| Peinf101Scf01436g08002.1 | PhUGT73 | 452 | 51.76 | 8.61 | 44.94 | 95.02 | Microsome |
| Peinf101Scf05389g00003.1 | PhUGT74 | 510 | 57.75 | 6.26 | 47.07 | 86.96 | Microsome |
| Peinf101Scf00140g27001.1 | PhUGT75 | 461 | 52.12 | 6.34 | 58.05 | 92.62 | Microsome |
| Peinf101Scf02279g03005.1 | PhUGT76 | 451 | 50.85 | 7.19 | 34.58 | 90.11 | Microsome |
| Peinf101Scf00384g03002.1 | PhUGT77 | 455 | 51.33 | 5.09 | 44.85 | 91.05 | Microsome |
| Peinf101Scf00206g02001.1 | PhUGT78 | 439 | 49.56 | 5.19 | 43.01 | 92.32 | Microsome |
| Peinf101Scf01214g00005.1 | PhUGT79 | 573 | 64.47 | 5.58 | 41.9  | 93.39 | Microsome |
| Peinf101Scf01353g01020.1 | PhUGT80 | 405 | 46.14 | 6.52 | 42.79 | 96.25 | Microsome |
| Peinf101Scf00100g07011.1 | PhUGT81 | 462 | 51.92 | 6.02 | 45.91 | 97.06 | Microsome |
| Peinf101Scf01480g04001.1 | PhUGT82 | 453 | 51.31 | 5.65 | 39.69 | 96.36 | Microsome |
| Peinf101Scf00049g02009.1 | PhUGT83 | 510 | 56.89 | 5.84 | 37.16 | 98.88 | Microsome |
| Peinf101Scf00982g03005.1 | PhUGT84 | 473 | 52.67 | 5.21 | 44.61 | 85.16 | Microsome |
| Peinf101Scf01109g08011.1 | PhUGT85 | 423 | 47.50 | 5.64 | 51.56 | 85.51 | Cytoplasm |
| Peinf101Scf03062g00003.1 | PhUGT86 | 463 | 52.24 | 8.62 | 54.18 | 88.42 | Microsome |
| Peinf101Scf01969g01029.1 | PhUGT87 | 460 | 51.29 | 5.52 | 40.77 | 91.78 | Microsome |
| Peinf101Scf01064g05003.1 | PhUGT88 | 463 | 51.91 | 5.64 | 37.45 | 95.55 | Cytoplasm |
| Peinf101Scf17737g00004.1 | PhUGT89 | 464 | 52.73 | 5.98 | 50.58 | 80.24 | Microsome |
| Peinf101Scf00765g04002.1 | PhUGT90 | 402 | 45.48 | 5.97 | 45.46 | 96.69 | Microsome |
| Peinf101Scf00170g06003.1 | PhUGT91 | 403 | 45.00 | 5.18 | 39.45 | 94.81 | Microsome |
| Peinf101Scf00796g01039.1 | PhUGT92 | 384 | 43.28 | 5.16 | 50.02 | 95.99 | Microsome |
| Peinf101Scf00459g02001.1 | PhUGT93 | 438 | 48.91 | 5.28 | 40.9  | 87.85 | Microsome |
| Peinf101Scf01021g02001.1 | PhUGT94 | 470 | 52.68 | 5.14 | 46.77 | 94.23 | Microsome |
| Peinf101Scf00413g09031.1 | PhUGT95 | 458 | 51.90 | 6.28 | 36.89 | 88.76 | Microsome |

|                          |          |     |       |      |       |        |           |
|--------------------------|----------|-----|-------|------|-------|--------|-----------|
| Peinf101Scf02793g00017.1 | PhUGT96  | 552 | 62.32 | 6.93 | 50.14 | 88.33  | Microsome |
| Peinf101Scf01262g04007.1 | PhUGT97  | 468 | 51.93 | 5.59 | 31.78 | 98.44  | Microsome |
| Peinf101Scf00457g08002.1 | PhUGT98  | 496 | 55.26 | 5.42 | 41.7  | 101.61 | Microsome |
| Peinf101Scf00170g05019.1 | PhUGT99  | 471 | 52.22 | 6.8  | 37.96 | 96.26  | Microsome |
| Peinf101Scf00920g01006.1 | PhUGT100 | 479 | 53.42 | 5.72 | 44.05 | 89.71  | Microsome |
| Peinf101Scf00604g03002.1 | PhUGT101 | 489 | 55.50 | 5.41 | 49.51 | 99.24  | Microsome |
| Peinf101Scf00999g02027.1 | PhUGT102 | 486 | 55.08 | 5.43 | 41.12 | 88.21  | Microsome |
| Peinf101Scf00118g07015.1 | PhUGT103 | 506 | 56.94 | 6.33 | 48.57 | 86.5   | Microsome |
| Peinf101Scf01271g08005.1 | PhUGT104 | 486 | 54.12 | 5.39 | 36.31 | 94.07  | Microsome |
| Peinf101Scf00920g01023.1 | PhUGT105 | 529 | 59.19 | 5.82 | 42.96 | 93.42  | Microsome |
| Peinf101Scf02361g01006.1 | PhUGT106 | 298 | 33.89 | 6.76 | 52.21 | 88.32  | Cytoplasm |
| Peinf101Scf00791g08026.1 | PhUGT107 | 485 | 54.48 | 5.93 | 42.12 | 91.81  | Microsome |
| Peinf101Scf00545g08008.1 | PhUGT108 | 486 | 53.02 | 6.12 | 42.14 | 77.24  | Microsome |
| Peinf101Scf00871g02013.1 | PhUGT109 | 480 | 54.33 | 5.49 | 31    | 89.54  | Microsome |
| Peinf101Scf00652g13002.1 | PhUGT110 | 476 | 53.36 | 6.19 | 51.12 | 92.35  | Microsome |
| Peinf101Scf00364g03001.1 | PhUGT111 | 466 | 52.10 | 5.74 | 43.79 | 89.29  | Microsome |
| Peinf101Scf00652g13003.1 | PhUGT112 | 476 | 53.55 | 6.13 | 48.48 | 92.16  | Microsome |
| Peinf101Scf02055g00016.1 | PhUGT113 | 474 | 53.79 | 5.65 | 45.73 | 87.17  | Microsome |
| Peinf101Scf00631g01006.1 | PhUGT114 | 323 | 36.15 | 5.28 | 47.97 | 95.36  | Microsome |
| Peinf101Scf01050g07016.1 | PhUGT115 | 453 | 51.22 | 6.21 | 41.07 | 87.81  | Microsome |
| Peinf101Scf00622g05007.1 | PhUGT116 | 481 | 54.43 | 5.84 | 30.82 | 95.99  | Microsome |
| Peinf101Scf00791g00003.1 | PhUGT117 | 468 | 52.71 | 6.15 | 49.8  | 94.36  | Microsome |
| Peinf101Scf00914g05017.1 | PhUGT118 | 504 | 56.84 | 5.45 | 48.66 | 94.6   | Microsome |
| Peinf101Scf00405g07004.1 | PhUGT119 | 474 | 53.66 | 6.62 | 44.94 | 94.37  | Microsome |
| Peinf101Scf01201g00015.1 | PhUGT120 | 475 | 53.98 | 6.25 | 44.19 | 90.08  | Microsome |
| Peinf101Scf01353g00004.1 | PhUGT121 | 350 | 39.50 | 4.87 | 42.61 | 93.8   | Microsome |
| Peinf101Scf01117g09007.1 | PhUGT122 | 311 | 35.34 | 6.62 | 46.44 | 84.63  | Microsome |
| Peinf101Scf00765g03001.1 | PhUGT123 | 308 | 34.58 | 5.84 | 35.64 | 97.99  | Cytoplasm |
| Peinf101Scf01556g05036.1 | PhUGT124 | 438 | 48.43 | 5.66 | 40.71 | 91.21  | Microsome |
| Peinf101Scf00073g14003.1 | PhUGT125 | 476 | 53.81 | 5.29 | 35.16 | 90.29  | Microsome |
| Peinf101Scf00837g06001.1 | PhUGT126 | 469 | 54.18 | 5.46 | 40.17 | 93.28  | Microsome |
| Peinf101Scf00837g08016.1 | PhUGT127 | 483 | 54.88 | 5.91 | 39.75 | 87.25  | Microsome |
| Peinf101Scf01775g08003.1 | PhUGT128 | 472 | 53.93 | 5.48 | 47.31 | 93.14  | Microsome |

|                          |          |     |       |      |       |       |           |
|--------------------------|----------|-----|-------|------|-------|-------|-----------|
| Peinf101Scf01048g01001.1 | PhUGT129 | 471 | 53.48 | 5.65 | 56.76 | 84.27 | Microsome |
|--------------------------|----------|-----|-------|------|-------|-------|-----------|

---
